# Supplementary material for: Porous Fe2O3 nanocubes derived from MOFs for highly reversible lithium storage
Source: Royal Society of Chemistry journal article supplement (doi:10.1039/c3ce40996a), 2013-01-01
Supplement: c3ce40996a.pdf [file c3ce40996a.pdf]

## Electronic Supplementary Information

---

### **Porous Fe<sub>2</sub>O<sub>3</sub> nanocubes derived from MOFs for highly reversible lithium storage**

*Lei Zhang,<sup>a</sup> Hao Bin Wu,<sup>a</sup> Rong Xu,<sup>\*a</sup> and Xiong Wen (David) Lou<sup>\*a</sup>*

<sup>a</sup> School of Chemical and Biomedical Engineering, Nanyang Technological University, 62 Nanyang Drive, Singapore 637459. Email: [rxu@ntu.edu.sg](mailto:rxu@ntu.edu.sg); [xwlou@ntu.edu.sg](mailto:xwlou@ntu.edu.sg)

Webpage: <http://www.ntu.edu.sg/home/xwlou/>

## Experimental Section

*Materials Synthesis.* In a typical procedure, polyvineypyrrolidone (PVP, K30, MW ~ 40000, 3.0 g) and  $K_4Fe(CN)_6 \cdot 3H_2O$  (0.226 g) were added to a HCl solution (0.01 M, 40 mL) under magnetic stirring. After stirring for 30 min, a clear solution was obtained. The reaction mixture was then transferred into a 100 mL polytetrafluoroethylene (Teflon)-lined stainless-steel autoclave and kept in an electric oven at 80 °C for 24 h. The autoclave was then taken out from the oven and left to cool to room temperature. The obtained blue product was filtered and washed several times with distilled water and absolute ethanol and finally dried in a vacuum oven at 25 °C for 12 h. To convert the Prussian blue nanocubes into porous  $Fe_2O_3$  nanocubes, the as-synthesized Prussian blue product was heated at a temperature of 350 °C with a heating rate of 1 °C min<sup>-1</sup> for 6 h in air. The  $\alpha$ - $Fe_2O_3$  microparticles are synthesized by adding 90 mL of 6 M NaOH into 100 mL of 2 M  $FeCl_3$  under vigorous stirring, followed by the addition of 10 mL of 0.6 M  $Na_2SO_4$ . The solution was then heated at 102 °C for 4 days in an air-flow electric oven.

*Materials Characterization.* X-ray diffraction (XRD) patterns were collected on a Bruker D8 Advanced X-Ray Diffractometer with Ni filtered Cu K $\alpha$  radiation ( $\lambda=1.5406$  Å) at a voltage of 40 kV and a current of 40 mA. Field-emission scanning electron microscopy (FESEM) images were acquired on a JEOL JSM 6700F microscope operated at 5 kV. Transmission electron microscopy (TEM) images were taken on JEOL 2010 and JEOL 2100F microscopes. Thermogravimetric analysis (TGA) was carried out under air flow with a temperature ramp of 10 °C min<sup>-1</sup>. Nitrogen sorption measurement was performed on Autosorb 6B at liquid N<sub>2</sub> temperature.

*Electrochemical Measurements.* The electrochemical tests were carried out in two-electrode Swagelok cells. The working electrodes consist of 70% of active material, 20% of conductive carbon black (Super-P-Li), and 10% of polymer binder (polyvinylidene fluoride, PVDF). The electrolyte is 1

M LiPF<sub>6</sub> in a mixture of ethylene carbonate and diethyl carbonate (1:1 by weight). Lithium foil was used as the counter and reference electrode. Cell assembly was carried out in an Ar-filled glovebox with moisture and oxygen concentrations below 1.0 ppm. The charge-discharge tests were performed on a NEWARE battery tester.

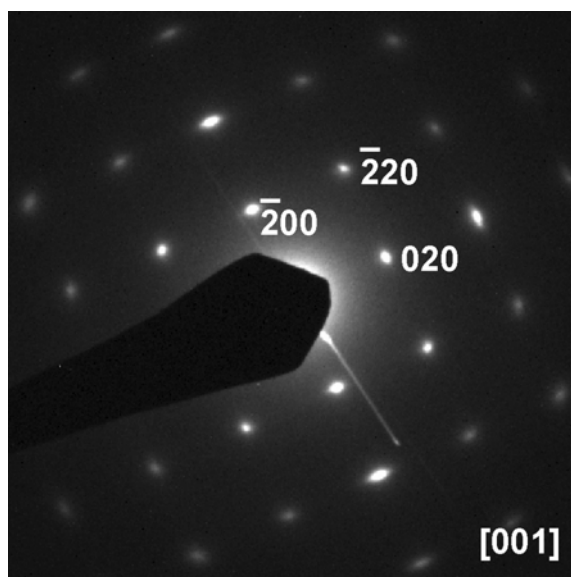

**Fig. S1** Selected-area electron diffraction (SAED) pattern of a Fe<sub>4</sub>[Fe(CN)<sub>6</sub>]<sub>3</sub> nanocube.

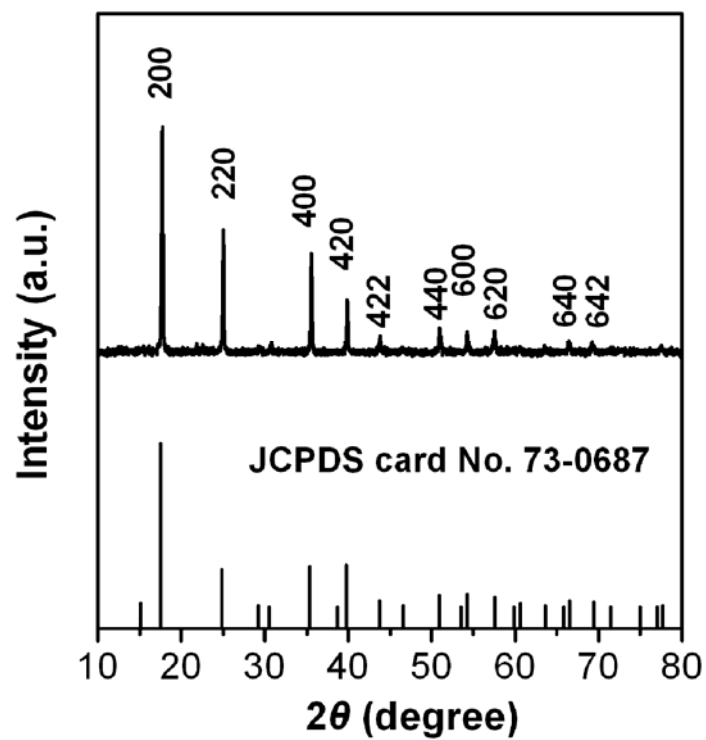

Fig. S2 XRD pattern of Fe<sub>4</sub>[Fe(CN)<sub>6</sub>]<sub>3</sub> nanocubes.

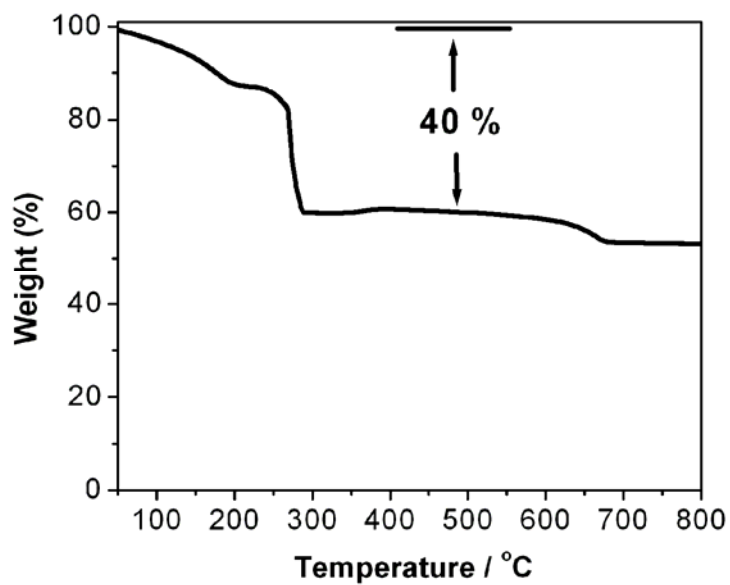

Fig. S3 TGA curve of Fe<sub>4</sub>[Fe(CN)<sub>6</sub>]<sub>3</sub> nanocubes in air flow.

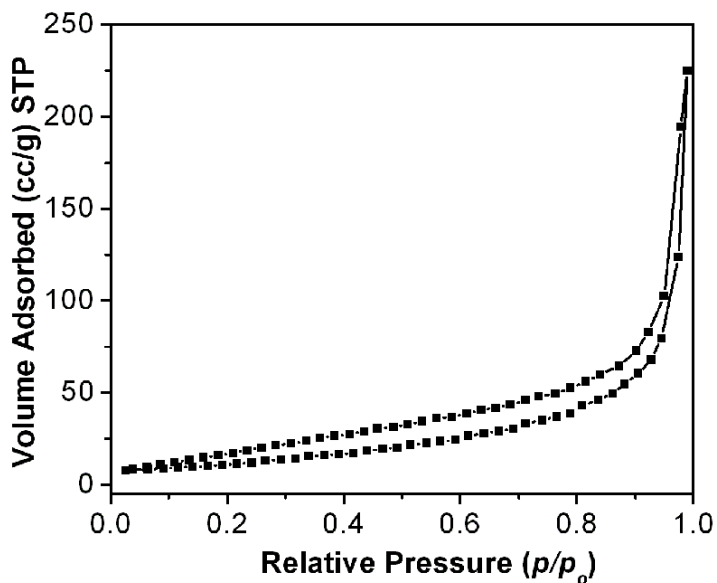

**Fig. S4**  $N_2$  adsorption-desorption isotherm of porous  $Fe_2O_3$  nanocubes.

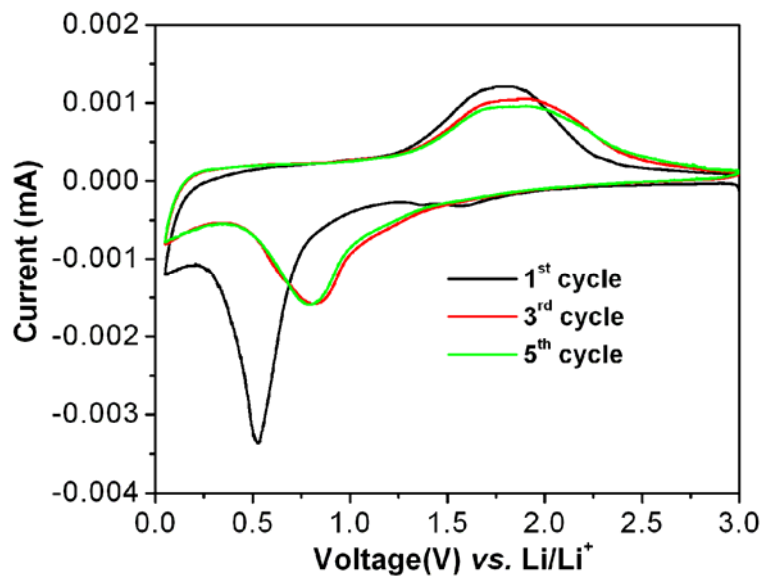

**Fig. S5** CV profiles of porous  $Fe_2O_3$  nanocubes showing the 1<sup>st</sup>, 3<sup>rd</sup> and 5<sup>th</sup> cycles between 0.05 and 3.0 V at a scan rate of  $0.5 \text{ mV s}^{-1}$ .

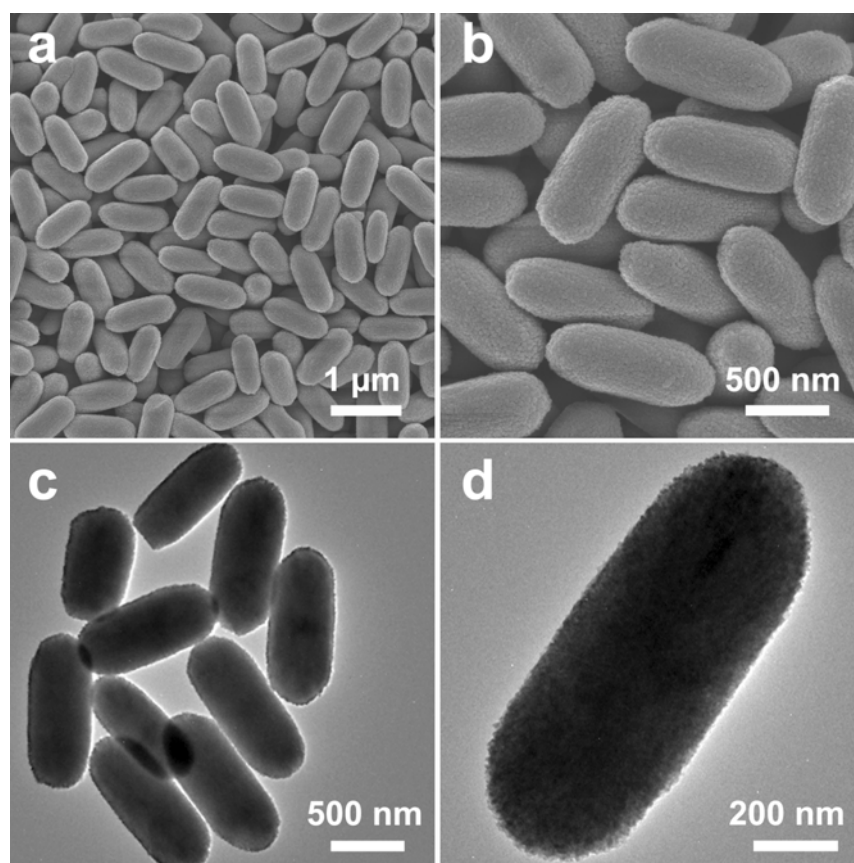

**Fig. S6** (a, b) FESEM and (c, d) TEM images of  $\alpha$ -Fe<sub>2</sub>O<sub>3</sub> microparticles.

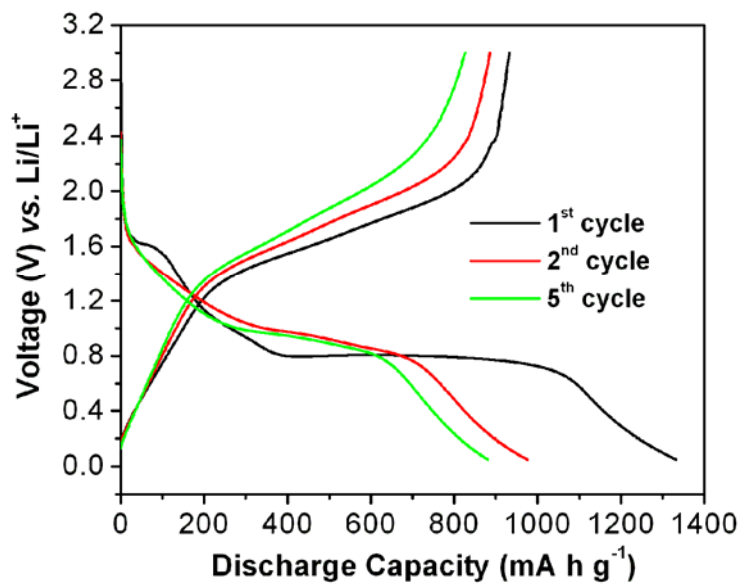

**Fig. S7** Discharge/charge voltage profiles of  $\alpha$ -Fe<sub>2</sub>O<sub>3</sub> microparticles in the voltage window of 0.05 – 3.0 V vs. Li/Li<sup>+</sup> at the same current density of 200 mA g<sup>-1</sup>.

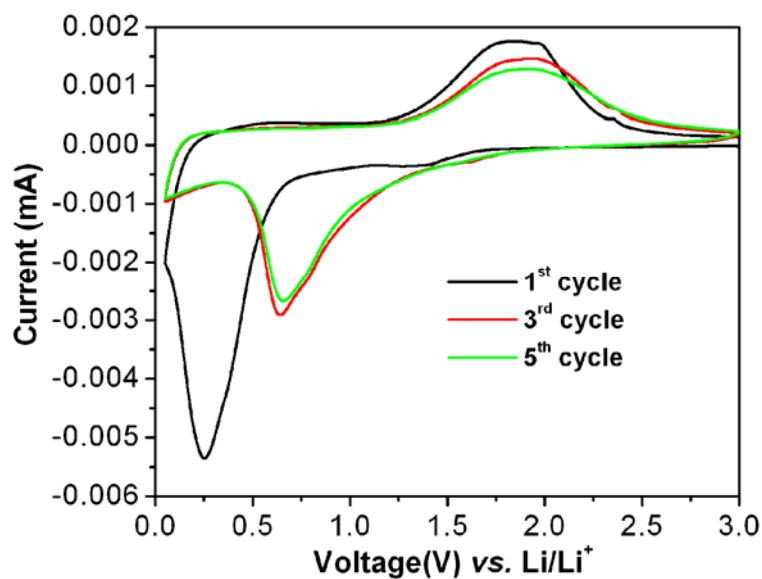

**Fig. S8** CV profiles of  $\alpha$ -Fe<sub>2</sub>O<sub>3</sub> microparticles showing the 1<sup>st</sup>, 3<sup>rd</sup> and 5<sup>th</sup> cycles between 0.05 and 3.0 V at a scan rate of 0.5 mV s<sup>-1</sup>.
